# Supplementary material for: Association between intake of non-sugar sweeteners and health outcomes: systematic review and meta-analyses of randomised and non-randomised controlled trials and observational studies
Source: PubMed Central journal article supplement — BMJ. 2019 Jan 2;364:k4718. doi: 10.1136/bmj.k4718 (PMC6313893; doi:10.1136/bmj.k4718), 2019-01-02
Supplement: toei046063.ww1.pdf [file toei046063.ww1.pdf]

## Supplementary file 1: Supplementary materials

### Example of search strategy

„Artificial sweeteners” and “Natural non-caloric sweeteners” search strategy for Ovid MEDLINE(R) In-Process & Other Non-Indexed Citations and Ovid MEDLINE(R) <1946 to Present>

- 1 Aspartame/
- 2 aspartame\*.mp.
- 3 acesulfame.mp.
- 4 ace K.mp.
- 5 Saccharin/
- 6 saccharin\*.mp.
- 7 sucralose.mp.
- 8 neotame.mp.
- 9 advantame.mp.
- 10 Cyclamates/
- 11 cyclamate\*.mp.
- 12 neohesperidin.mp.
- 13 alitame\*.mp.
- 14 artificial sweetener\*.mp.
- 15 Stevia/
- 16 stevia\*.mp.
- 17 steviol\*.mp.
- 18 stevioside\*.mp.
- 19 rebaudioside\*.mp.
- 20 rebiana\*.mp.
- 21 thaumatin\*.mp.
- 22 brazzein\*.mp.
- 23 mogroside\*.mp.
- 24 ((non-calori\* or noncalori\*) adj (sweetener\* or sweetner\*)).mp.
- 25 ((non-sugar or nonsugar) adj (sweetener\* or sweetner\*)).mp.
- 26 ((non-nutritive or nonnutritive) adj (sweetener\* or sweetner\*)).mp.
- 27 ((low-calori\* or lowcalori\*) adj (sweetener\* or sweetner\*)).mp.
- 28 ((intense or high intensity or high potency) adj (sweetener\* or sweetner\*)).mp.
- 29 natural sweetener\*.mp.
- 30 Non-Nutritive Sweeteners/
- 31 natural sweetening agent\*.mp.
- 32 sugar substitute\*.mp.
- 33 ((non-caloric or noncaloric or zero caloric or diet) adj (beverage\* or drink\*)).mp.
- 34 sweetening agents/ or non-nutritive sweeteners/
- 35 or/1-34
- 36 exp animals/ not humans.mp. [mp=title, abstract, original title, name of substance word, subject heading word, keyword heading word, protocol supplementary concept word, rare disease supplementary concept word, unique identifier]
- 37 35 not 36

### Risk of Bias assessment of randomised controlled trials

|                 | Random sequence generation (selection bias) | Allocation concealment (selection bias) | Blinding of participants and personnel (performance bias) | Blinding of outcome assessment (detection bias) | Incomplete outcome data (attrition bias) | Selective reporting (reporting bias) | Other sources of bias |
|-----------------|---------------------------------------------|-----------------------------------------|-----------------------------------------------------------|-------------------------------------------------|------------------------------------------|--------------------------------------|-----------------------|
| Baird 2000      | ?                                           | ?                                       | -                                                         | ?                                               | +                                        | ?                                    | +                     |
| Ballantyne 2011 | ?                                           | ?                                       | ?                                                         | ?                                               | ?                                        | ?                                    | +                     |
| Blackburn 1997  | +                                           | ?                                       | -                                                         | ?                                               | +                                        | +                                    | +                     |
| Eeden 1991      | ?                                           | ?                                       | +                                                         | +                                               | -                                        | +                                    | +                     |
| Kanders 1988    | ?                                           | ?                                       | -                                                         | +                                               | +                                        | +                                    | +                     |
| Kim 2011        | ?                                           | ?                                       | ?                                                         | ?                                               | ?                                        | ?                                    | +                     |
| Kuzma 2015      | +                                           | +                                       | +                                                         | +                                               | +                                        | -                                    | +                     |
| Lee 2012        | ?                                           | ?                                       | ?                                                         | ?                                               | ?                                        | +                                    | +                     |
| Lindseth 2014   | ?                                           | ?                                       | ?                                                         | -                                               | ?                                        | +                                    | +                     |
| Maersk 2012     | ?                                           | ?                                       | -                                                         | -                                               | +                                        | +                                    | +                     |
| Maki 2008       | ?                                           | ?                                       | +                                                         | ?                                               | +                                        | +                                    | +                     |
| Raben 2001      | ?                                           | ?                                       | +                                                         | ?                                               | +                                        | +                                    | +                     |
| Reid 2007       | ?                                           | ?                                       | +                                                         | ?                                               | +                                        | +                                    | +                     |
| Reid 2010       | ?                                           | ?                                       | +                                                         | ?                                               | +                                        | +                                    | +                     |
| Reid 2014       | -                                           | ?                                       | ?                                                         | -                                               | +                                        | +                                    | +                     |
| Spiers 1998     | ?                                           | ?                                       | +                                                         | +                                               | +                                        | +                                    | +                     |
| Warrington 2011 | ?                                           | ?                                       | +                                                         | ?                                               | +                                        | +                                    | +                     |
| Beiswanger 1998 | ?                                           | ?                                       | ?                                                         | -                                               | -                                        | +                                    | ?                     |
| deRuyter 2011   | +                                           | +                                       | +                                                         | +                                               | +                                        | +                                    | +                     |
| Frey 1976       | ?                                           | ?                                       | ?                                                         | ?                                               | +                                        | +                                    | +                     |
| Knopp 1976      | ?                                           | ?                                       | +                                                         | ?                                               | +                                        | +                                    | +                     |
| Taljaard 2013   | ?                                           | ?                                       | ?                                                         | ?                                               | +                                        | ?                                    | +                     |

Figure 3: Risk of bias summary of RCTs including adults (top) and children (bottom)

## Effects of interventions

| Study ID                                                    | Effect of NSSs on body weight                                                    |
|-------------------------------------------------------------|----------------------------------------------------------------------------------|
| <b>RCTs</b>                                                 |                                                                                  |
| Baird 2000                                                  | „No evidence of weight loss.“                                                    |
| Ballantyne 2011                                             | „Weight is unaffected.“                                                          |
| Kim 2011                                                    | 0.22 kg weight gain in intervention group<br>0.9 kg weight gain in control group |
| <b>Controlled clinical trials and observational studies</b> |                                                                                  |
| Naismith 1995                                               | „No appreciable effect“                                                          |
| Naismith 1995                                               | „No appreciable effect“                                                          |
| Parker 1997                                                 | „Significantly higher in intervention group“                                     |
| Porikos 1982                                                | „Significantly higher in control group“                                          |
| Duran Aguero 2015                                           | OR 0.2 [0.029 to 3.06]                                                           |
| Fernandes 2013                                              | OR for larger waist circumference OR 1.01 [1.00 to 1.01]<br>1.00 [1.00 to 1.00]  |
| Kuk 2016                                                    | MD in BMI 1.10 [0.39 to 1.81]<br>MD in BMI 0.70 [-0.18 to 1.58]                  |
| Wulaningsih 2017                                            | OR for abdominal obesity with aspartame 1.13 [1.01 to 1.26]                      |

Table 1: Effect of NSSs on different outcome measures of overweight and obesity in healthy adults

| Study ID        | Outcome           | MD [95% CI]              |
|-----------------|-------------------|--------------------------|
| Warrington 2011 | HbA1c (%)         | -0.12 [-0.37 to 0.13]    |
| Warrington 2011 | C-peptide (ng/ml) | -0.06 [-0.60 to 0.48]    |
| Raben 2001      | HOMA $\beta$ (%)  | -12.20 [-24.48 to 0.08]  |
| Raben 2001      | GIP (pmol/l)      | -4.70 [-8.89 to -0.51]   |
| Raben 2001      | GLP-1 (pmol/l)    | -4.40 [-6.34 to -2.46]   |
| Raben 2001      | Leptin (ng/ml)    | -11.80 [-18.33 to -5.27] |

Table 2: Effect of NSSs on intermediate markers for diabetes in healthy adults (end of study data only)

| Study ID                                     | Outcome             | MD [95% CI]                  |
|----------------------------------------------|---------------------|------------------------------|
| Raben 2001, Reid, 2010, Reid 2014, Reid 2007 | Carbohydrate intake | -89.49 g [-104.35 to -74.63] |
| Naismith 1995, Tordoff 1990                  | Carbohydrate intake | -7.15 kJ [-387.82 to 373.53] |
| Raben 2001, Reid, 2010, Reid 2014, Reid 2007 | Fat intake          | 3.93 g [-2.51 to 10.37]      |
| Raben 2001, Reid 2010, Reid 2014, Reid 2007  | Protein intake      | 1.67 g [-1.21 to 4.54]       |
| Naismith 1995, Tordoff 1990                  | Protein intake      | 6.07 g [-1.40 to 13.55]      |

Table 3: Effect of NSSs on macronutrient intake in healthy adults

| Study ID       | Type of cancer | OR [95% CI]         |
|----------------|----------------|---------------------|
| Cabaniols 2011 | Brain          | 1.02 [0.57 to 1.85] |
| Gallus 2007    | Breast         | 0.88 [0.70 to 1.10] |
| Gallus 2007    | Colon          | 0.92 [0.75 to 1.13] |
| Bosetti 2009   | Endometrial    | 0.71 [0.36 to 1.38] |
| Bosetti 2009   | Gastric        | 0.65 [0.25 to 1.68] |
| Lim 2006       | Gliomas        | 0.64 [0.37 to 1.10] |
| Gallus 2007    | Larynx         | 1.59 [0.98 to 2.58] |
| Gallus 2007    | Oesophagus     | 1.04 [0.52 to 2.09] |

|                           |                              |                     |
|---------------------------|------------------------------|---------------------|
| Gallus 2007               | Oral cavity and pharynx      | 0.79 [0.45 to 1.39] |
| Gallus 2007               | Ovary                        | 0.61 [0.38 to 0.98] |
| Lim 2006                  | Overall hematopoietic cancer | 0.89 [0.76 to 1.27] |
| Bosetti 2009              | Pancreatic                   | 0.19 [0.08 to 0.46] |
| Gallus 2007               | Prostate                     | 1.08 [0.81 to 1.45] |
| Gallus 2007               | Rectum                       | 0.79 [0.60 to 1.05] |
| Gallus 2007, Goodman 1986 | Renal cell cancer            | 1.04 [0.81 to 1.34] |
| McCullough 2014           | Hodgkin lymphoma             | 0.77 [0.44 to 1.32] |
| McCullough 2014           | Multiple Myeloma             | 0.85 [0.62 to 1.17] |
| McCullough 2014           | All non-Hodgkin lymphoma     | 1.29 [1.08 to 1.54] |

Table 4: Effect of NSSs on the risk for different types of cancer

| Study ID                                 | Outcome                                    | MD [95% CI]                    |
|------------------------------------------|--------------------------------------------|--------------------------------|
| Raben 2001, Warrington 2011              | serum <b>triglyceride</b> concentration    | -0.02 mmol/l [-0.21 to 0.16]   |
| Raben 2001, Warrington 2011, Frey 1976*  | <b>serum triglyceride</b>                  | 0.27 mmol/l [-0.92 to 1.46]    |
| Maersk 2012, Raben 2001, Warrington 2011 | <b>serum cholesterol</b> concentrations    | -0.14 mmol/l [-0.84 to 0.56]   |
| Maersk 2012, Warrington 2011             | <b>LDL cholesterol</b> concentration       | -0.09 mmol/l [-1.04 to 0.86]   |
| Maersk 2012, Raben 2001, Warrington 2011 | serum <b>HDL cholesterol</b> concentration | -0.01 mmol/dl [-0.08 to 0.05]  |
| Stanhope 2013, Stanhope 2015             | serum triglyceride concentrations          | "No difference between groups" |

Table 5: Effect of NSSs on intermediate markers of cardiovascular disease in healthy adults, \* sensitivity analysis

| Dose                                          | OR [95% CI]      |
|-----------------------------------------------|------------------|
| Aspartame first consumed at age <3            | 1.0 [0.3 to 3.1] |
| Aspartame first consumed at age of 3-7 y      | 1.2 [0.4 to 3.6] |
| Aspartame consumption duration <2 y           | 1.2 [0.4 to 3.3] |
| Aspartame consumption duration ≥2 y           | 1.1 [0.3 to 3.4] |
| Aspartame consumption duration <1 times/week  | 1.6 [0.5 to 5.2] |
| Aspartame consumption duration ≥ 1 times/week | 0.9 [0.3 to 2.4] |

Table 6: Effect of different exposure categories of aspartame on risk for brain cancer in children

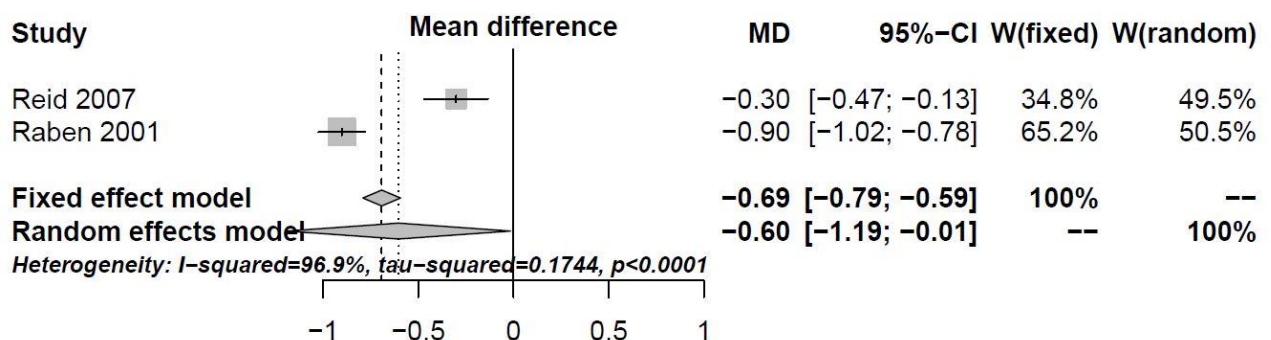

Figure 1: Effect of NSSs versus caloric sweetener on BMI in adults

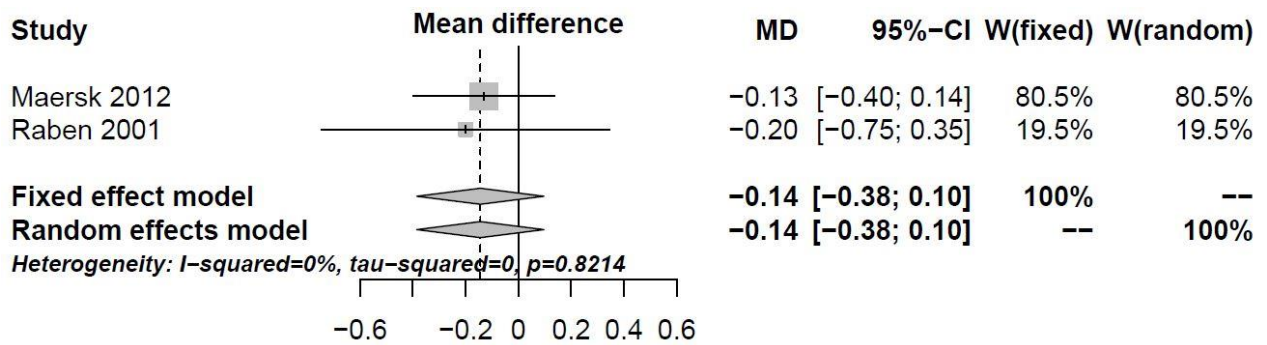

Figure 2: Effect of NSSs versus caloric sweetener on HOMA-IR in adults

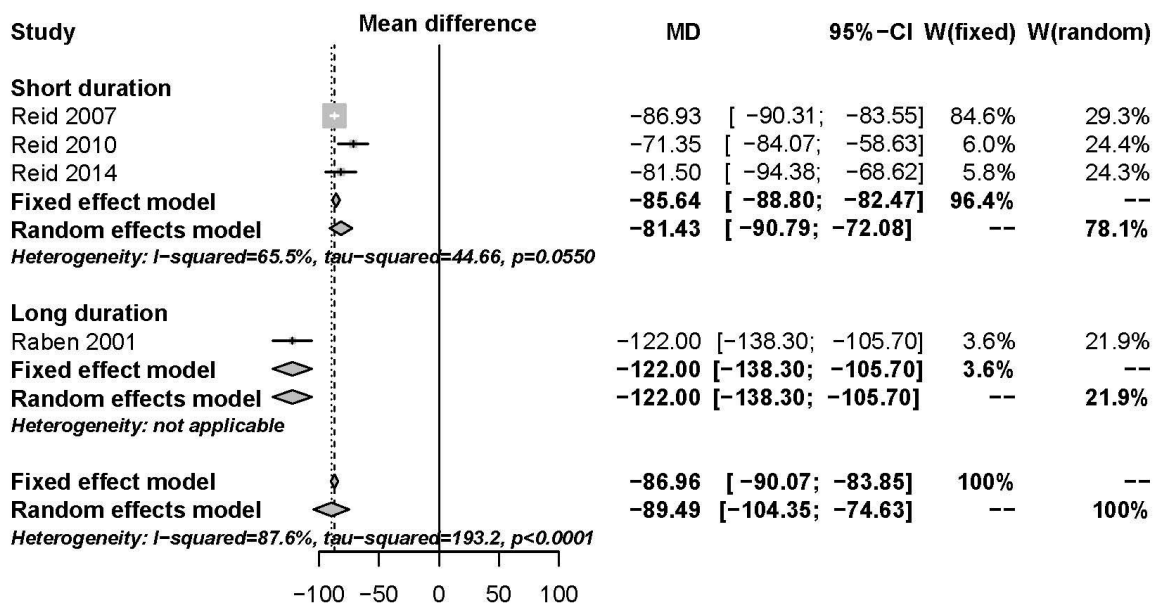

Figure 3: Effect of aspartame (Reid 1007, 2010 2014) or combination of NSSs (Raben2001) versus caloric sweetener on daily carbohydrate intake (g) by study duration in adults

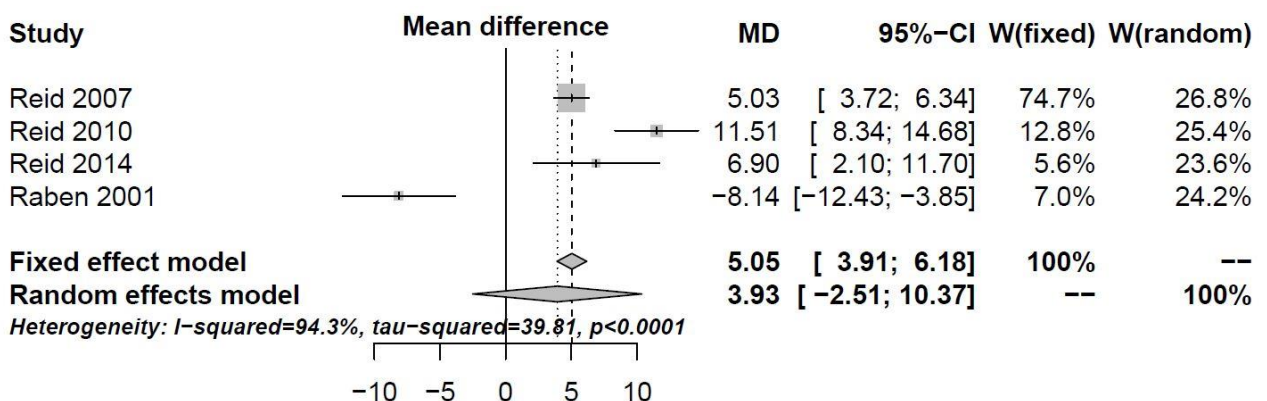

Figure 4: Effect of aspartame (Reid 1007, 2010 2014) or combination of NSSs (Raben2001) versus caloric sweetener on daily fat intake (g) in adults

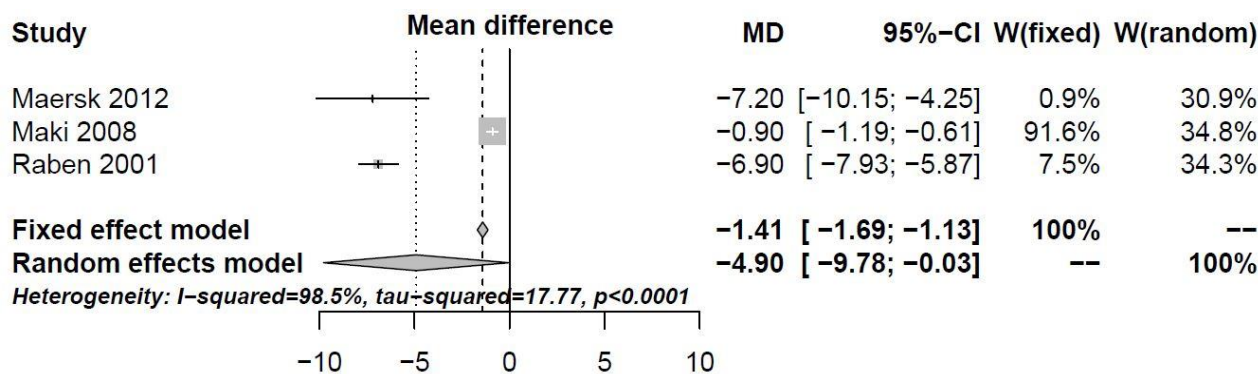

Figure 5: Effect of NSSs versus caloric sweeteners (Maersk 2012, Raben 2001) or placebo (Maki 2008) on systolic blood pressure in adults

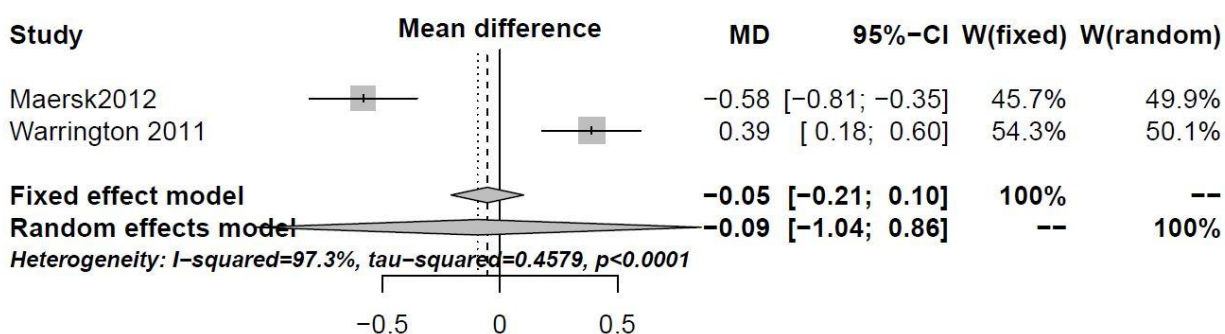

Figure 6: Effect of aspartame versus caloric sweetener (Maersk 2012) and advantame versus placebo (Warrington 2011) on LDL cholesterol in adults

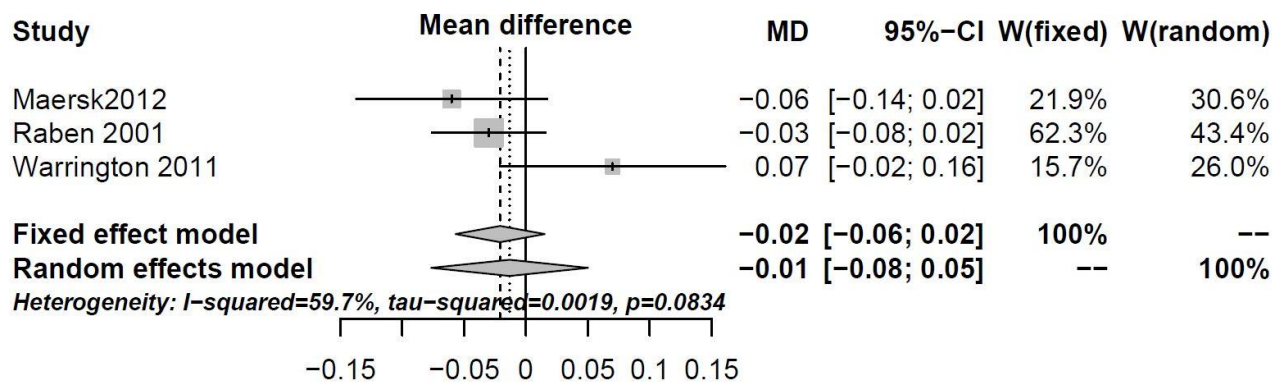

Figure 7: Effect of NSSs versus caloric sweetener (Maersk 2012, Raben 2001) or placebo (Warrington 2011) on HDL cholesterol in adults

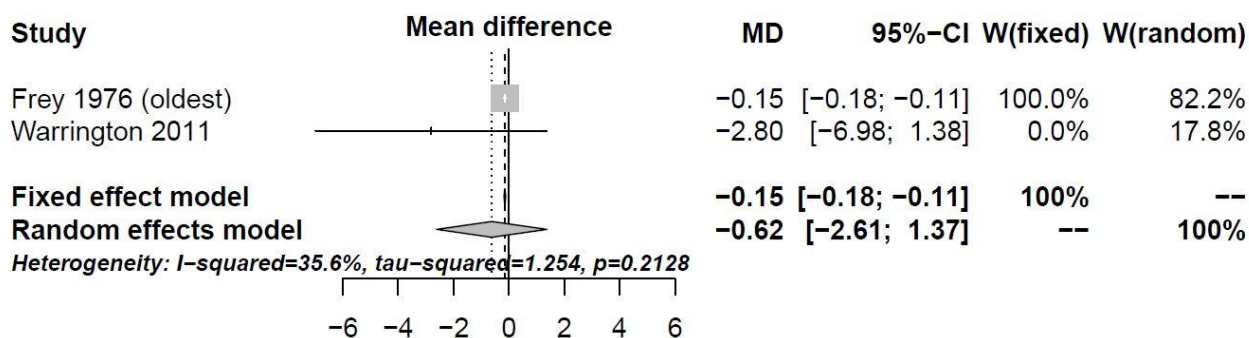

Figure 8: Effect of NSSs on change in creatinine (mg/dl) in adults

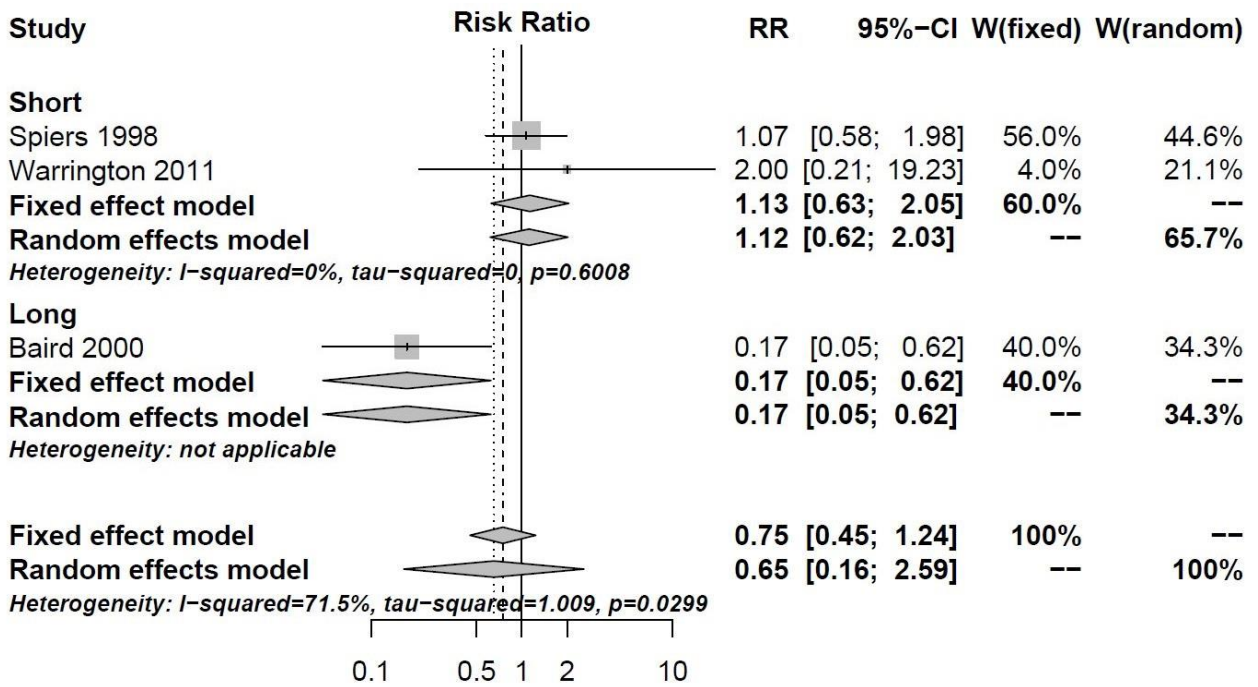

Figure 9: Effect of NSSs versus caloric sweetener (Baird 2000) or placebo (Spiers 1998, Warrington2011) on risk for adverse events in adults by duration

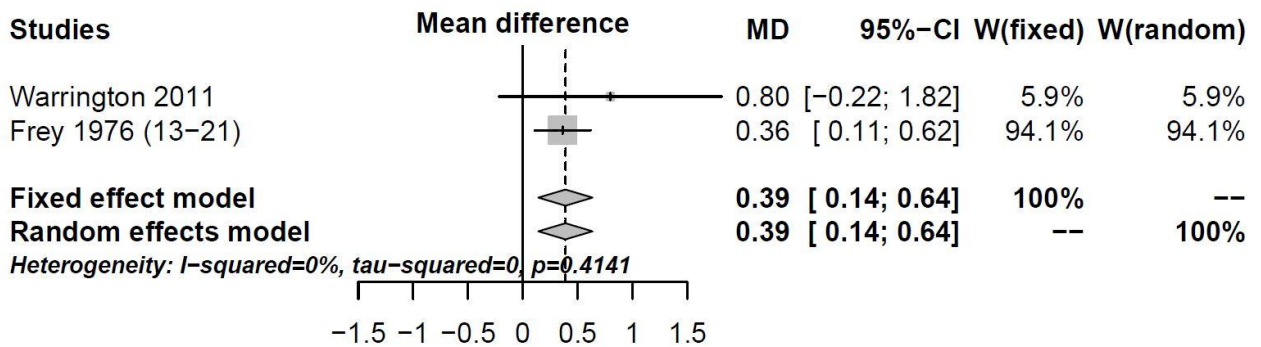

Figure 10: Effect of NSSs on change in haematocrit (%) in adults

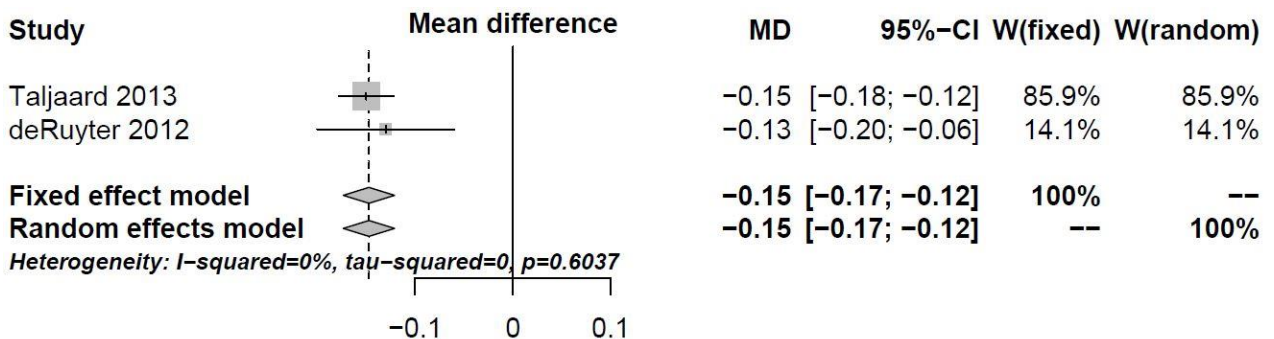

Figure 11: Effect of NSSs on change in BMI z-score in children

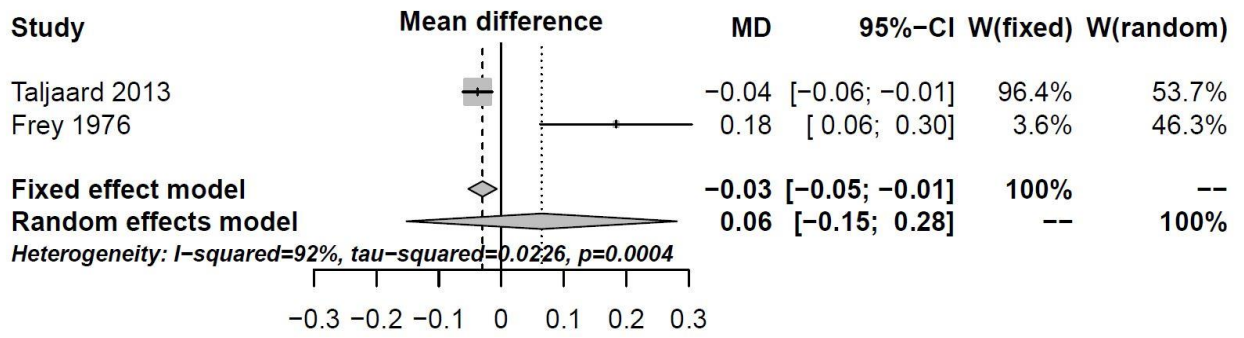

Figure 12: Effect of NSSs on blood Hb in children
