# Supplementary material for: Association between intake of non-sugar sweeteners and health outcomes: systematic review and meta-analyses of randomised and non-randomised controlled trials and observational studies
Source: PubMed Central journal article supplement — BMJ. 2019 Jan 2;364:k4718. doi: 10.1136/bmj.k4718 (PMC6313893; doi:10.1136/bmj.k4718), 2019-01-02
Supplement: toei046063.ww2.pdf [file toei046063.ww2.pdf]

Supplementary file 2: Results of the assessment of risk of bias in included observational studies

| <b>Study ID</b>    | <b>1. Bias caused by confounding</b> | <b>2. Bias caused by selection of participants</b> | <b>3. Bias caused by classification of interventions</b> | <b>4. Bias caused by deviations from intended interventions</b> | <b>5. Attrition bias caused by missing data</b> | <b>6. Detection bias caused by measurement of outcomes</b> | <b>7. Reporting bias caused by selection of the reported results</b> | <b>Overall judgement</b> |
|--------------------|--------------------------------------|----------------------------------------------------|----------------------------------------------------------|-----------------------------------------------------------------|-------------------------------------------------|------------------------------------------------------------|----------------------------------------------------------------------|--------------------------|
| Bosetti 2009       | SERIOUS                              | SERIOUS                                            | SERIOUS                                                  | MODERATE                                                        | LOW                                             | SERIOUS                                                    | MODERATE                                                             | SERIOUS                  |
| Cabaniols 2011     | SERIOUS                              | SERIOUS                                            | SERIOUS                                                  | MODERATE                                                        | LOW                                             | SERIOUS                                                    | MODERATE                                                             | SERIOUS                  |
| Cartwright 1981    | SERIOUS                              | SERIOUS                                            | SERIOUS                                                  | MODERATE                                                        | LOW                                             | MODERATE                                                   | MODERATE                                                             | SERIOUS                  |
| Colditz 1990       | SERIOUS                              | MODERATE                                           | SERIOUS                                                  | MODERATE                                                        | SERIOUS                                         | LOW                                                        | MODERATE                                                             | SERIOUS                  |
| Duran Aguero 2015  | SERIOUS                              | MODERATE                                           | SERIOUS                                                  | MODERATE                                                        | No information                                  | MODERATE                                                   | SERIOUS                                                              | SERIOUS                  |
| Gallus 2007        | SERIOUS                              | SERIOUS                                            | SERIOUS                                                  | MODERATE                                                        | LOW                                             | SERIOUS                                                    | MODERATE                                                             | SERIOUS                  |
| Goodman 1986       | SERIOUS                              | SERIOUS                                            | MODERATE                                                 | MODERATE                                                        | LOW                                             | SERIOUS                                                    | MODERATE                                                             | SERIOUS                  |
| Guo 2014           | SERIOUS                              | SERIOUS                                            | SERIOUS                                                  | MODERATE                                                        | SERIOUS                                         | LOW                                                        | MODERATE                                                             | SERIOUS                  |
| Gurney 1997        | SERIOUS                              | SERIOUS                                            | SERIOUS                                                  | MODERATE                                                        | LOW                                             | SERIOUS                                                    | MODERATE                                                             | SERIOUS                  |
| Howe 1977          | SERIOUS                              | SERIOUS                                            | SERIOUS                                                  | MODERATE                                                        | SERIOUS                                         | LOW                                                        | MODERATE                                                             | SERIOUS                  |
| Iscovich 1987      | SERIOUS                              | SERIOUS                                            | SERIOUS                                                  | MODERATE                                                        | LOW                                             | SERIOUS                                                    | MODERATE                                                             | SERIOUS                  |
| Kessler 1978       | SERIOUS                              | SERIOUS                                            | SERIOUS                                                  | MODERATE                                                        | LOW                                             | SERIOUS                                                    | MODERATE                                                             | SERIOUS                  |
| Lim 2006           | SERIOUS                              | MODERATE                                           | SERIOUS                                                  | MODERATE                                                        | SERIOUS                                         | MODERATE                                                   | MODERATE                                                             | SERIOUS                  |
| McCullogh 2013     | SERIOUS                              | SERIOUS                                            | SERIOUS                                                  | MODERATE                                                        | MODERATE                                        | LOW                                                        | MODERATE                                                             | SERIOUS                  |
| Moller-Jensen 1983 | SERIOUS                              | SERIOUS                                            | SERIOUS                                                  | MODERATE                                                        | SERIOUS                                         | SERIOUS                                                    | MODERATE                                                             | SERIOUS                  |
| Momas 1994         | SERIOUS                              | SERIOUS                                            | SERIOUS                                                  | MODERATE                                                        | SERIOUS                                         | MODERATE                                                   | MODERATE                                                             | SERIOUS                  |
| Mommsen 1983       | SERIOUS                              | SERIOUS                                            | SERIOUS                                                  | MODERATE                                                        | LOW                                             | MODERATE                                                   | MODERATE                                                             | SERIOUS                  |
| Naismith 1995      | SERIOUS                              | MODERATE                                           | SERIOUS                                                  | MODERATE                                                        | LOW                                             | LOW                                                        | MODERATE                                                             | SERIOUS                  |
| Naismith 1995      | SERIOUS                              | MODERATE                                           | SERIOUS                                                  | MODERATE                                                        | LOW                                             | LOW                                                        | MODERATE                                                             | SERIOUS                  |
| Najem 1982         | SERIOUS                              | SERIOUS                                            | SERIOUS                                                  | MODERATE                                                        | LOW                                             | SERIOUS                                                    | MODERATE                                                             | SERIOUS                  |
| Nomura 1991        | SERIOUS                              | SERIOUS                                            | SERIOUS                                                  | MODERATE                                                        | MODERATE                                        | SERIOUS                                                    | MODERATE                                                             | SERIOUS                  |
| Parker 1997        | SERIOUS                              | SERIOUS                                            | SERIOUS                                                  | MODERATE                                                        | SERIOUS                                         | LOW                                                        | MODERATE                                                             | SERIOUS                  |
| Porikos 1982       | SERIOUS                              | MODERATE                                           | SERIOUS                                                  | MODERATE                                                        | MODERATE                                        | MODERATE                                                   | MODERATE                                                             | SERIOUS                  |
| Simon 1975         | SERIOUS                              | SERIOUS                                            | SERIOUS                                                  | MODERATE                                                        | MODERATE                                        | MODERATE                                                   | MODERATE                                                             | SERIOUS                  |

|                   |         |          |         |          |          |          |          |         |
|-------------------|---------|----------|---------|----------|----------|----------|----------|---------|
| Stanhope 2013     | SERIOUS | MODERATE | SERIOUS | MODERATE | MODERATE | MODERATE | MODERATE | SERIOUS |
| Stanhope 2015     | SERIOUS | MODERATE | SERIOUS | MODERATE | MODERATE | LOW      | MODERATE | SERIOUS |
| Tordoff 1990      | SERIOUS | MODERATE | LOW     | MODERATE | LOW      | LOW      | MODERATE | SERIOUS |
| Wolraich 1994     | SERIOUS | SERIOUS  | LOW     | LOW      | LOW      | LOW      | MODERATE | SERIOUS |
| Yu 1997           | SERIOUS | SERIOUS  | SERIOUS | MODERATE | LOW      | SERIOUS  | MODERATE | SERIOUS |
| Zanela 2002       | SERIOUS | MODERATE | LOW     | MODERATE | LOW      | LOW      | MODERATE | SERIOUS |
| Duran Agüero 2014 | SERIOUS | SERIOUS  | SERIOUS | LOW      | LOW      | LOW      | MODERATE | SERIOUS |
| Kuk 2016          | SERIOUS | SERIOUS  | SERIOUS | LOW      | MODERATE | LOW      | MODERATE | SERIOUS |
| Wulaningsih 2016  | SERIOUS | SERIOUS  | SERIOUS | LOW      | MODERATE | LOW      | MODERATE | SERIOUS |
| Serra-Majem 1996  | SERIOUS | SERIOUS  | SERIOUS | LOW      | LOW      | LOW      | MODERATE | SERIOUS |
| Fernandes 2013    | SERIOUS | SERIOUS  | SERIOUS | LOW      | LOW      | LOW      | MODERATE | SERIOUS |
