# Supplementary material for: Association between intake of non-sugar sweeteners and health outcomes: systematic review and meta-analyses of randomised and non-randomised controlled trials and observational studies
Source: PubMed Central journal article supplement — BMJ. 2019 Jan 2;364:k4718. doi: 10.1136/bmj.k4718 (PMC6313893; doi:10.1136/bmj.k4718), 2019-01-02
Supplement: toei046063.ww3.pdf [file toei046063.ww3.pdf]

Supplementary file 3: Details of included studies (RCT = randomised, controlled trial; non-RCT = non-randomised controlled trial; AS = artificial sweetener, CVD = cardiovascular disease); \*For profit funding includes sponsoring of study material, i.e. intervention substances, as well as financial sponsoring for conducting the study

| Study ID             | Study design          | Population               | N Intervention | N Control | N overall / at baseline | For-profit funding* | Intervention                                              | Source             | Dose                                                                                | Duration           | Control                              | Outcomes                                                                   |
|----------------------|-----------------------|--------------------------|----------------|-----------|-------------------------|---------------------|-----------------------------------------------------------|--------------------|-------------------------------------------------------------------------------------|--------------------|--------------------------------------|----------------------------------------------------------------------------|
| 1. Baird 2000        | RCT                   | Adults, healthy          | 77             | 31        | 118                     | yes                 | Sucralose                                                 | Liquid             | in ascending dose (125, 250 and 500 mg during week 1-3, 4-7 and 8-12, respectively) | 90 days / 12 weeks | Fructose                             | Body weight, CVD, adverse effects                                          |
| 2. Ballantyne 2011   | RCT                   | Adults, overweight males | 20             | 20        | 40                      | yes                 | Aspartame                                                 | Liquid             | No information, only no. and kJ of drinks                                           | 8 weeks            | Sucrose                              | Body, weight, eating behaviour, preference for sweet taste, mood           |
| 3. Blackburn 1997    | RCT                   | Adults, overweight       | 82             | 81        | 186                     | yes                 | Aspartame                                                 | Mixed              | No information                                                                      | 16 weeks           | "Avoidance of low energy sweeteners" | Body weight, eating behaviour, preference for sweet taste, adverse effects |
| 4. Bosetti 2009      | Case-control study    | Adults                   | -              | -         | 3117                    | no                  | Saccharin                                                 | Mixed              | No information                                                                      | 10-16 years        | No intervention                      | Cancer                                                                     |
| 5. Cabaniols 2011    | Case-control study    | Adults                   | 122            | 122       | 244                     | no                  | Aspartame                                                 | Mixed              | No information                                                                      | 5 years            | No intervention                      | Cancer                                                                     |
| 6. Cartwright 1981   | Case-control study    | Adults probably          | -              | -         | 1901                    | no                  | Saccharin                                                 | Tabletop sweetener | No information                                                                      | at least 1 year    | No intervention                      | Cancer                                                                     |
| 7. Colditz 1990      | Cohort study          | Adults, female           | -              | -         | 31940                   | no                  | Saccharin                                                 | Mixed              | 0.0 - 5.8, or more than 5.8 g                                                       | 8 years            | No intervention                      | Body weight                                                                |
| 8. deRuyter 2012     | RCT                   | Children, healthy        | 319            | 322       | 641                     | no                  | Combination of NSSs (40 mg sucralose, 10 mg acesulfame-K) | Liquid             | 40 mg sucralose, 10 mg acesulfame-K                                                 | 18 months          | Sucrose                              | Body weight, eating behaviour                                              |
| 9. Duran Aguero 2014 | Cross-sectional study | Children                 | -              | -         | 1224                    | no                  | Aspartame, acesulfame, cyclamate, saccharin               | Mixed              | No information                                                                      | No information     | No exposure                          | Body weight                                                                |

|                       |                       |                                    |       |      |                                 |     |                                      |                    |                                                 |                |                 |                                                                     |
|-----------------------|-----------------------|------------------------------------|-------|------|---------------------------------|-----|--------------------------------------|--------------------|-------------------------------------------------|----------------|-----------------|---------------------------------------------------------------------|
| 10. Duran Aguero 2015 | Cross-sectional study | Adults                             | -     | -    | 1224                            | no  | Acesulfame or sucralose or aspartame | Mixed              | No information                                  | No information | No exposure     | Body weight                                                         |
| 11. Eeden 1991        | RCT                   | Adults, with aspartame sensitivity | 32    |      | 44                              | yes | Aspartame                            | Capsule            | 30 mg/kg bw                                     | 7 days         | Placebo         | Adverse effects                                                     |
| 12. Fernandes 2013    | Cross-sectional study | Adults                             | -     | -    | 261                             | no  | Aspartame or saccharin or sucralose  | Mixed              | No information                                  | No information | No exposure     | Body weight, CVD                                                    |
| 13. Frey 1976         | RCT                   | Children                           | 61    | 65   | 126                             | yes | Aspartame                            | Mixed              | Depending on age: 610, 800, 1600, 2000, 2400 mg | 13 weeks       | Sucrose         | Body weight, eating behaviour, CVD, kidney disease, adverse effects |
| 14. Gallus 2007       | Case-control study    | Adults                             | 10510 | 7028 | 17538                           | no  | Saccharin or aspartame               | Mixed              | No information                                  | 2 years        | No intervention | Cancer                                                              |
| 15. Goodman 1986      | Case-control study    | Adults probably                    | -     | -    | 534                             | no  | Saccharin                            | Mixed              | No information                                  | No information | No intervention | Cancer                                                              |
| 16. Guo 2014          | Cohort study          | Adults                             | -     | -    | 566398; 263923 with enough data | no  | Saccharin                            | Tabletop sweetener | No information                                  | 10 years       | Sugar           | Mood                                                                |
| 17. Gurney 1997       | Case-control study    | Children                           | 56    | 94   | 150                             | no  | Aspartame                            | Mixed              | No information                                  | No information | No exposure     | Cancer                                                              |
| 18. Howe 1977         | Case-control study    | Adults                             | -     | -    | 1264                            | no  | Saccharin                            | Mixed              | No information                                  | No information | No intervention | Cancer                                                              |
| 19. Iscovich 1987     | Case-control study    | Adults probably                    | -     | -    | 351                             | no  | Saccharin                            | Mixed              | No information                                  | No information | No intervention | Cancer                                                              |
| 20. Kanders 1988      | RCT                   | Adults, overweight                 | 29    | 30   | 59                              | yes | Aspartame                            | Mixed              | 278mg - 311mg - 383 mg increase over time       | 12 weeks       | No intervention | Body weight, preference for sweet taste, CVD                        |
| 21. Kessler 1978      | Case-control study    | Adults                             | -     | -    | 519                             | no  | Saccharin or cyclamate               | Mixed              | No information                                  | No information | No intervention | Cancer                                                              |
| 22. Kim 2011          | RCT                   | Adults probably                    | 9     | 12   | 21                              | no  | Aspartame                            | Liquid             | No information                                  | 4 weeks        | Sugar           | Body weight, CVD                                                    |

|                        |                       |                      |         |          |        |     |                                               |                    |                                |                |                             |                                                                               |
|------------------------|-----------------------|----------------------|---------|----------|--------|-----|-----------------------------------------------|--------------------|--------------------------------|----------------|-----------------------------|-------------------------------------------------------------------------------|
| 23. Knopp 1976         | RCT                   | Children, overweight | 22      | 33       | 59     | yes | Aspartame                                     | Capsule            | 2.7 00 mg                      | 7 weeks        | Placebo                     | Body weight, eating behaviour, diabetes, CVD, kidney disease, adverse effects |
| 24. Kuk 2016           | Cross-sectional study | Adults               | -       | -        | 2856   | no  | Aspartame or saccharin                        | Mixed              | No information                 | No information | No exposure                 | Body weight, diabetes, preference for sweet taste, CVD                        |
| 25. Kuzma 2015         | Cross-over RCT        | Adults               | -       | -        | 10     | no  | Aspartame                                     | Liquid             | -                              | 8 days         | Glucose or fructose         | Body weight, eating behaviour                                                 |
| 26. Lee 2012           | RCT                   | Adults probably      | unclear | unclear  | 51     | no  | Aspartame                                     | Liquid             | up to 600mg or more / day      | 2 weeks        | Sugar                       | Diabetes, cancer                                                              |
| 27. Lim 2006           | Cohort study          | Adults               | -       | -        | 473984 | no  | Aspartame                                     | Liquid             | No information                 | No information | Aspartame                   | Cancer                                                                        |
| 28. Lindseth 2014      | RCT                   | Adults               | -       | -        | 30     | no  | Aspartame                                     | Mixed              | 10 mg / kg bw or 25 mg / kg bw | 8 days         | Aspartame                   | Mood, adverse effects, neurocognition                                         |
| 29. Maersk 2012        | RCT                   | Adults, overweight   | 12      | 10/13/12 | 60     | yes | Aspartame                                     | Liquid             | No information                 | 6 months       | Mix of glucose and fructose | Body weight, diabetes, CVD                                                    |
| 30. Maki 2008          | RCT                   | Adults               | 50      | 50       | 100    | yes | Stevia                                        | Capsule            | 1000 mg                        | 4 weeks        | Placebo                     | Body weight, CVD                                                              |
| 31. McCullough fin     | Cohort study          | Adults               | -       | -        | 101638 | no  | Aspartame                                     | Tabletop sweetener | No information                 | No information | Aspartame                   | Cancer                                                                        |
| 32. Moller-Jensen 1983 | Case-control study    | Adults probably      | -       | -        | 1156   | no  | Saccharin or cyclamate                        | Mixed              | No information                 | No information | No intervention             | Cancer                                                                        |
| 33. Momas 1994         | Case-control study    | Adults               | 219     | 792      | 1011   | no  | Saccharin                                     | Mixed              | No information                 | No information | No intervention             | Cancer                                                                        |
| 34. Mommsen 1983       | Case-control study    | Adults               | -       | -        | 141    | no  | Saccharin                                     | Mixed              | No information                 | No information | No intervention             | Cancer                                                                        |
| 35. Naismith 1995      | Cross-over non-RCT    | Adults               | -       | -        | 6      | no  | Combination of NSSs (acesulfame-k, aspartame) | Mixed              | No information                 | 10 days        | Sugar                       | Body weight, eating behaviour                                                 |

|                      |                    |                    |     |      |      |     |                                                                                      |        |                                                  |                        |                      |                                                                          |
|----------------------|--------------------|--------------------|-----|------|------|-----|--------------------------------------------------------------------------------------|--------|--------------------------------------------------|------------------------|----------------------|--------------------------------------------------------------------------|
| 36. Naismith 1995    | Cross-over non-RCT | Adults             | -   | -    | 14   | no  | Combination of NSSs (acesulfame-k, aspartame)                                        | Mixed  | No information                                   | 10 days                | Sugar                | Body weight, eating behaviour                                            |
| 37. Najem 1982       | Case-control       | Adults             | 76  | 150  | 226  | no  | Saccharin                                                                            | Mixed  | No information                                   | No information         | No intervention      | Cancer                                                                   |
| 38. Nomura 1991      | Case-control       | Adults             | 261 | 522  | 783  | no  | Saccharin                                                                            | Mixed  | No information                                   | No information         | No intervention      | Cancer                                                                   |
| 39. Parker 1997      | Cohort             | Adults             | -   | -    | 465  | no  | Saccharin                                                                            | Mixed  | 0-28.2g                                          | 1 year exposure        | Sugar or no exposure | Body weight                                                              |
| 40. Porikos 1982     | Cross-over non-RCT | Adults             | -   | -    | 6    | yes | Aspartame                                                                            | Mixed  | No information                                   | 12 days                | Sugar                | Body weight, eating behaviour, preference for sweet taste                |
| 41. Raben 2001       | RCT                | Adults, overweight | 20  | 21   | 41   | yes | Combination of AS (54% aspartame, 23% cyclamate, 22% acesulfame K, and 1% saccharin) | Mixed  | 4800, 5700, or 6700 mg depending on weight group | 10 weeks               | Sucrose              | Body weight, diabetes, eating behaviour, preference for sweet taste, CVD |
| 42. Reid 2007        | RCT                | Adults             | 68  | 65   | 133  | no  | Aspartame                                                                            | Liquid | No information                                   | 4 weeks                | Sucrose              | Body weight, eating behaviour                                            |
| 43. Reid 2010        | RCT                | Adults, overweight | 29  | 24   | 71   | yes | Aspartame                                                                            | Liquid | No information                                   | 4 weeks                | Sucrose              | Body weight, eating behaviour, preference for sweet taste.               |
| 44. Reid 2014        | RCT                | Adults, obese      | 21  | 20   | 44   | yes | Aspartame                                                                            | Liquid | No information                                   | 4 weeks                | Sucrose              | Body weight, eating behaviour, preference for sweet taste.               |
| 45. Serra-Majem 1996 | Cross-sectional    | Adults, mostly     | 441 | 2009 | 2450 | yes | Cyclamate                                                                            | Mixed  | 0.38 - 3.50 unit not given                       | 2 days prior to survey | No exposure          | Body weight                                                              |
| 46. Simon 1975       | Case-control       | Adults             | 135 | 538  | 673  | no  | Cyclamate                                                                            | Liquid | No information                                   | No information         | No exposure          | Cancer                                                                   |

|                      |                    |                                                             |     |             |       |     |                        |            |                                                                                                 |                          |                          |                                                                                         |
|----------------------|--------------------|-------------------------------------------------------------|-----|-------------|-------|-----|------------------------|------------|-------------------------------------------------------------------------------------------------|--------------------------|--------------------------|-----------------------------------------------------------------------------------------|
| 47. Spiers 1998      | Cross-over RCT     | Adults                                                      | -   | -           | 48    | yes | Aspartame              | Capsule    | 45 mg / kw bw, low: 15 mg/kg bw                                                                 | 20 days                  | Placebo                  | Mood, adverse effects, neuro-cognition                                                  |
| 48. Stanhope 2013    | non-RCT            | Adults                                                      | 23  | 18/16/28    | 80    | no  | Aspartame              | Liquid     | No information                                                                                  | 12 days                  | Sugar                    | CVD                                                                                     |
| 49. Stanhope 2015    | non-RCT            | Adults                                                      | 23  | 18/16/28    | 85    | no  | Aspartame              | Liquid     | No information                                                                                  | 2 weeks                  | Sugar                    | CVD                                                                                     |
| 50. Taljaard 2013    | RCT                | Children                                                    | 103 | 104/103/103 | 414   | yes | Sucralose              | Liquid     | No information                                                                                  | 20 weeks                 | Sucrose                  | Body weight, eating behaviour, neurocognition                                           |
| 51. Tordoff 1990     | Cross-over non-RCT | Adults                                                      | -   | -           | 41    | no  | Aspartame              | Liquid     | 590 mg                                                                                          | 21 days                  | High fructose corn syrup | Body weight, eating behaviour, preference for sweet taste                               |
| 52. Warrington 2011  | RCT                | Adults                                                      | 12  | 12          | 24    | yes | Advantame              | Capsule    | 0.375–0.5 mg/kg body weight                                                                     | 4 weeks                  | Placebo                  | Diabetes, CVD, kidney disease, adverse effects                                          |
| 53. Wolraich 1994    | Cross-over non-RCT | Children, Partly with sugar sensitivity reported by parents | -   | -           | 48    | yes | Aspartame or saccharin | Mixed      | Aspartame: preschool: 693 mg, school-age: 864 mg, saccharin: preschool: 214, School-age: 256 mg | 3 weeks                  | Sugar                    | Eating behaviour, diabetes, preference for sweet taste, mood, behaviour, neurocognition |
| 54. Wulaningsih 2017 | Cross-sectional    | Adults                                                      | -   | -           | 15731 | no  | Aspartame              | Mixed      | No information                                                                                  | No information           | No exposure              | Body weight                                                                             |
| 55. Yu 1997          | Case-control       | Adults                                                      | 127 | 254         | 381   | no  | Saccharin              | Mixed      | No information                                                                                  | Up to more than 15 years | No exposure              | Cancer                                                                                  |
| 56. Zanela 2002      | non-RCT            | Children                                                    | 50  | 50/50/50    | 200   | no  | Stevia                 | Mouthrinse | No information                                                                                  | 4 weeks                  | Water                    | Dental health                                                                           |
